# Supplementary material for: The effect of 2′-fluorine substitutions on DNA i-motif conformation and stability
Source: Royal Society of Chemistry journal article supplement (doi:10.1039/b804833a), 2008-01-01
Supplement: b804833a.pdf [file b804833a.pdf]

## **Supporting Information**

### **Effect of 2' Fluorine Substitutions on DNA i-motif Structure and Stability**

Clare P. Fenna<sup>†</sup>, Victoria J. Wilkinson<sup>†</sup>, John R.P. Arnold<sup>†</sup>, Richard Cosstick<sup>§\*</sup>, and Julie Fisher<sup>†\*</sup>.

*School of Chemistry, University of Leeds, Leeds, LS2 9JT (UK); Department of Chemistry, University of Liverpool, Crown St., Liverpool, L69 7ZD, UK.*

#### **Experimental Details.**

##### *Oligonucleotide Synthesis and Purification.*

Oligonucleotide strands were synthesised on a solid phase support using phosphoramidite chemistry with an Applied Biosystems ABI 391 PCR-Mate<sup>TM</sup> EP oligonucleotide synthesiser. Phosphoramidites purchased from Glen Research (UK). Standard procedures were adopted for cleavage from CPG and deprotection<sup>[1]</sup> except for the modified sequences for which the reaction time was reduced to 5 hours to prevent further reaction at the fluorine modifications.

Samples were purified by reverse phase and ion-exchange High Performance Liquid Chromatography (HPLC) as required<sup>[1]</sup>. Samples were then desalted using a pre-packed sephadex column.

In preparation for UV and NMR experiments samples were heated to 95 °C for 5 minutes and allowed to cool slowly to room temperature. They were then stored for 1 week at 4 °C prior to data collection.

##### *UV Absorbance Melting Experiments.*

Ultraviolet absorbance melting experiments were performed on a Hewlett Packard 8452A UV diode array spectrometer with a computer controlled Peltier device. Samples of 5 µM concentration were heated from 19 °C to 90 °C at intervals of 0.5 °C, with each temperature interval maintained for 5 minutes.  $T_m$  values were taken from the first derivative of the sigmoidal absorbance versus temperature plots.

##### *NMR spectroscopy.*

<sup>1</sup>H NMR spectra were recorded for samples in 90% H<sub>2</sub>O/ 10% D<sub>2</sub>O solutions (of 50 mM citrate buffer) at 10 °C using a Bruker DRX 500. 2D NOESY spectra were collected with a mixing time of 200 ms and in 2048 data points. Water suppression was achieved using the WATERGATE sequence. Prior to Fourier transformation a window function with gb= 0.02 and lb= -10 was applied in both dimensions.

<sup>19</sup>F NMR experiments were run on a Varian Unity 500 Inova spectrometer using an H/F/C probe. The <sup>19</sup>F operating frequency was 470 MHz. A spectral width of 2000 Hz collected in 8192 pairs of complex points was used, giving an acquisition time of 4.1 s. Prior to Fourier transformation a line broadening of -

1 Hz and a Gaussian parameter of 0.06 was applied. The solvent induced isotope shift experiments were performed on samples in 5 mm diameter NMR tubes with a co-axial insert containing approximately 60 ul of D<sub>2</sub>O external lock. The field position was not changed between samples/experiments.

**Table S1.** Imino proton shifts for d(TCCCC) and d(TCCCfCC)

| Imino | TCCCC $\delta$ /ppm | TCCCfCC $\delta$ /ppm |
|-------|---------------------|-----------------------|
| T1    | 11.431              | 11.431                |
| C2    | 15.880              | 15.831                |
| C3    | 15.646              | 15.548                |
| C4    | 15.438              | 15.258                |
| C5    | 15.646              | 15.625                |

**Spectrum 1:** <sup>19</sup>F NMR spectrum of d(TCCCfCC) in H<sub>2</sub>O at 20 °C.

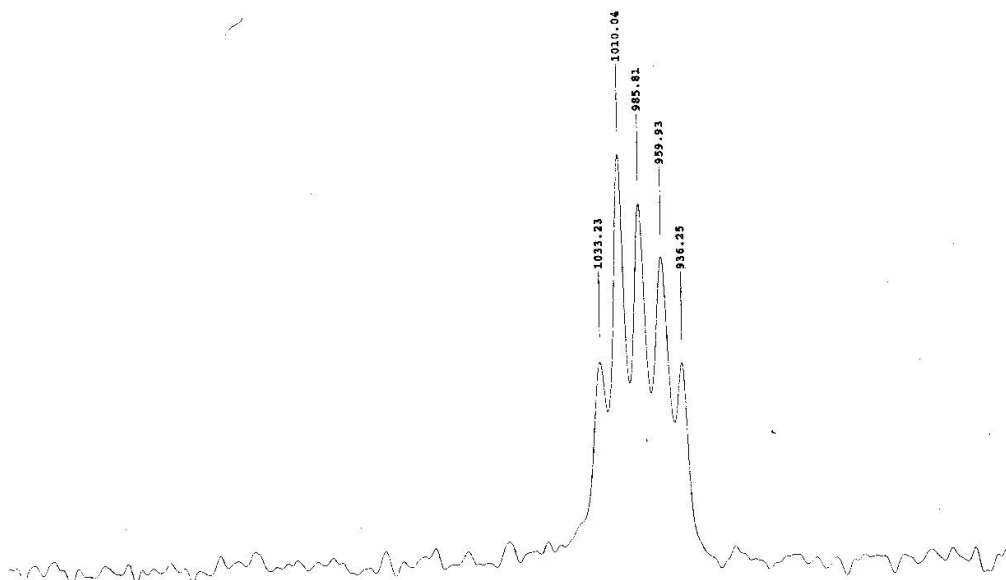

**Spectrum 2:**  $^{19}\text{F}$  NMR spectrum of d(TCCCfCC) in  $\text{D}_2\text{O}$  at  $20\text{ }^\circ\text{C}$

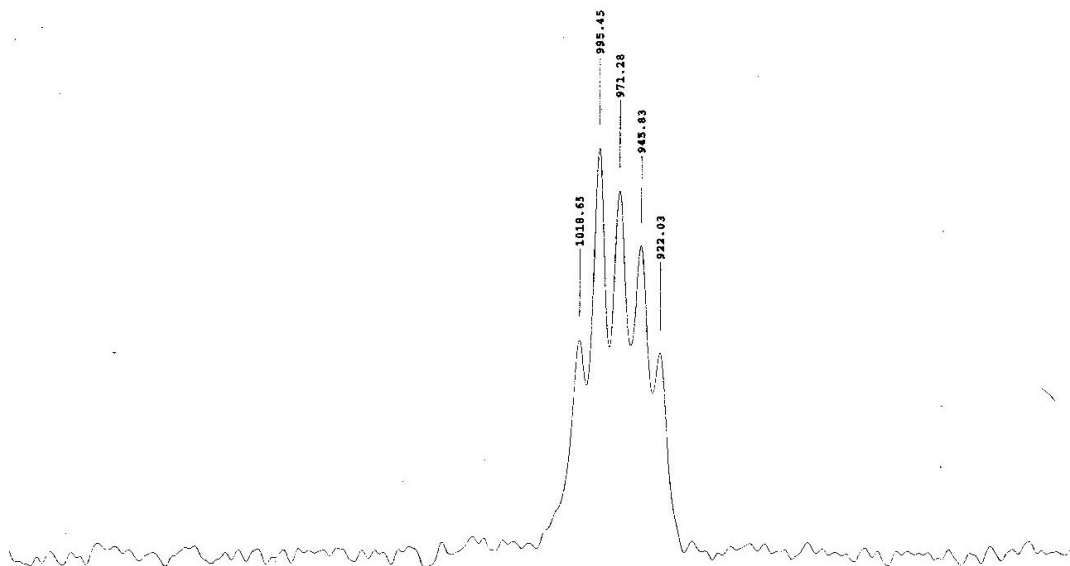

**Spectrum 3:** The imino-imino region of the 2D NOESY spectrum recorded for d(TCCCfCC) in 90%  $\text{H}_2\text{O}$ / 10%  $\text{D}_2\text{O}$ , (50 mM citrate buffer), at  $10\text{ }^\circ\text{C}$ .

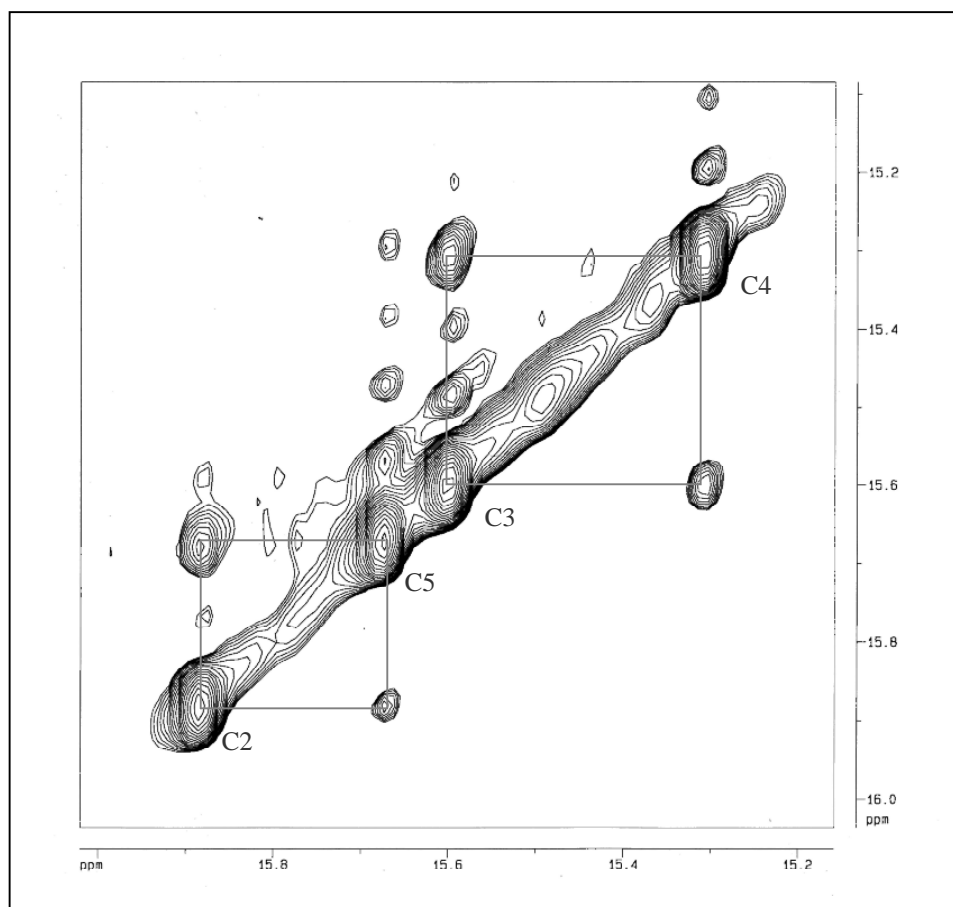

*pKa data for 2' Fluorocytidine*

| pH  | Frequency/Hz |
|-----|--------------|
| 2.7 | 2738.85      |
| 3.0 | 2734.62      |
| 3.2 | 2753.97      |
| 3.4 | 2782.68      |
| 3.6 | 2821.9       |
| 3.8 | 2877.15      |
| 4.0 | 2932.52      |
| 4.1 | 2989.43      |
| 4.2 | 3021.3       |
| 4.3 | 3059.16      |
| 4.4 | 3084.92      |
| 4.5 | 3117.22      |
| 4.6 | 3140.8       |
| 4.7 | 3154.78      |
| 4.8 | 3179.9       |
| 4.9 | 3200.41      |
| 5.0 | 3219.5       |
| 5.2 | 3251.29      |
| 5.4 | 3270.77      |
| 5.6 | 3286.41      |
| 5.8 | 3296.02      |
| 6.0 | 3304.23      |
| 6.5 | 3313         |

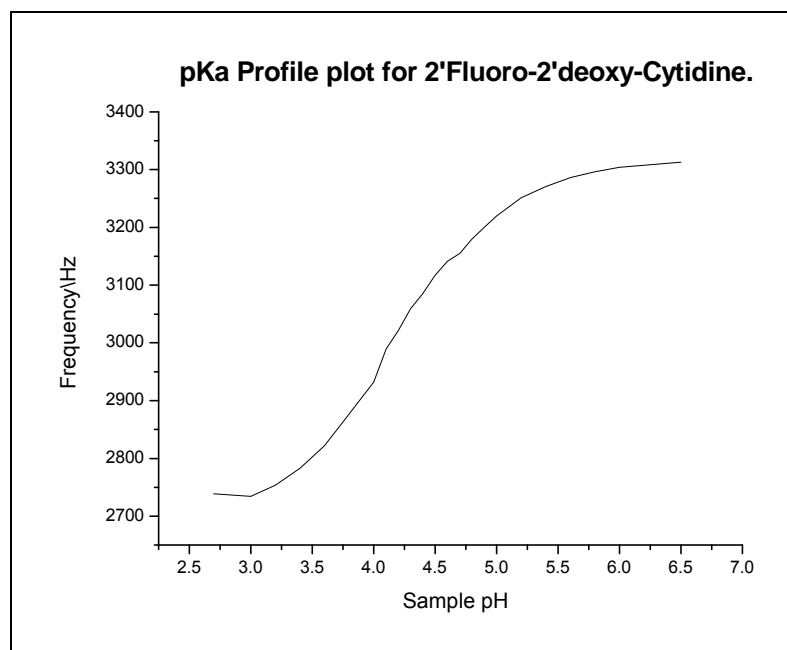

pH was adjusted using NaOD (40 wt. %, 100  $\mu$ l) in RNase free water (900  $\mu$ l) and DCI (35 wt. %, 100  $\mu$ l) in RNase free water (900  $\mu$ l), even though the sample was in 90% H<sub>2</sub>O /10 % D<sub>2</sub>O.

Spectra were recorded using an HFC triple resonance probe with a <sup>19</sup>F operating frequency of 470 MHz. A Boltzman fit of this data calculates the pKa of the N3 proton to be 4.18 $\pm$ 0.02. The pKa in the

oligonucleotide sequence is likely to be a little higher, in line with observations made for each of the natural nucleosides/nucleotides [2].

[1] Murray, J.B.; Collier, A.K; Arnold, J.R.P. *Analytical Biochemistry* **1994**, *218*, 177.

[2] Blackburn, G.M.; Gait, M.J.; Loakes, D.; Williams, D.M. Ed. , *Nucleic Acids in Chemistry and Biology*. 3rd Ed. RSCPublishing, Cambridge, 2006. pg 16.
